# Supplementary material for: Measuring treatment satisfaction in MS: Is the Treatment Satisfaction Questionnaire for Medication fit for purpose?
Source: PubMed Central journal article supplement — Mult Scler. 2016 Jun 30;23(4):604–13. doi: 10.1177/1352458516657441 (PMC5407510; doi:10.1177/1352458516657441), 2016-06-30
Supplement: MSJ657441_Supplemental_Table_1.pdf [file MSJ657441_Supplemental_Table_1.pdf]

**Supplementary Table 1.** Testing performed on relationships between clinical outcomes and TSQM domains.

| <b>Domain</b>                                | <b>Clinical outcome</b>                                                                                                                                                | <b>Rationale for choice</b>                                                                                                                                                       | <b>Hypothesis tested</b>                                                                                                                                                                                                                                                                                                                                                                   |
|----------------------------------------------|------------------------------------------------------------------------------------------------------------------------------------------------------------------------|-----------------------------------------------------------------------------------------------------------------------------------------------------------------------------------|--------------------------------------------------------------------------------------------------------------------------------------------------------------------------------------------------------------------------------------------------------------------------------------------------------------------------------------------------------------------------------------------|
| <b>Effectiveness and Global Satisfaction</b> | <b>Treatment failure</b><br>Confirmed relapse or permanent treatment discontinuation for any reason<br><b>Confirmed relapse</b>                                        | Primary study endpoint<br><br>A commonly used efficacy measure in studies of DMTs in RMS (other efficacy measures such as disability or MRI outcomes were not recorded in TENERE) | As clinical efficacy has been demonstrated for both teriflunomide and IFN $\beta$ , <sup>1-3</sup> as both Effectiveness and Global Satisfaction improve following initiation of teriflunomide treatment, <sup>4</sup> and as the clinical effectiveness of a treatment has been linked to treatment satisfaction, <sup>5</sup> we hypothesize that these sets of measures would be linked |
| <b>Side Effects</b>                          | <b>AEs leading to treatment discontinuation</b><br><br><b>Nervous system disorders</b><br><b>General disorders or administration-site conditions</b>                   | To be representative of the relationship between AEs and treatment satisfaction<br><br>The AEs with the highest incidence in this study                                           | Since tolerability is linked with patient treatment satisfaction, <sup>5</sup> we would expect to see a relationship between the Side Effects domain, and these AE parameters as a clinical outcome                                                                                                                                                                                        |
| <b>Convenience</b>                           | <b>Treated with sc IFN <math>\beta</math>-1a</b><br>Proxy for mode of administration (injection vs oral)<br><b>General disorders or administration-site conditions</b> | Convenience has been shown to be linked to mode of administration, <sup>6</sup> and specific outcomes for convenience are hard to identify in a randomized controlled trial       | We hypothesize that the improved convenience with teriflunomide vs IFN $\beta$ seen in TENERE, <sup>7</sup> may be explained by the differing modes of administration                                                                                                                                                                                                                      |

AE: adverse event; DMT: disease-modifying therapy; IFN: interferon; RMS: relapsing forms of MS; sc: subcutaneous; TSQM: Treatment Satisfaction Questionnaire for Medication (version 1.4).

## Table References

1. O'Connor P, Wolinsky JS, Confavreux C, et al. Randomized trial of oral teriflunomide for relapsing multiple sclerosis. *The New England journal of medicine*. 2011; 365: 1293-303.
2. Confavreux C, O'Connor P, Comi G, et al. Oral teriflunomide for patients with relapsing multiple sclerosis (TOWER): a randomised, double-blind, placebo-controlled, phase 3 trial. *The Lancet Neurology*. 2014; 13: 247-56.
3. Randomised double-blind placebo-controlled study of interferon beta-1a in relapsing/remitting multiple sclerosis. PRISMS (Prevention of Relapses and Disability by Interferon beta-1a Subcutaneously in Multiple Sclerosis) Study Group. *Lancet*. 1998; 352: 1498-504.
4. Coyle PK, LaGanke C, Khatri B, et al. Improvements in Patient-Reported Outcomes With Teriflunomide: Week 24 Interim Results From the US Cohort of the Teri-PRO Phase 4 Study. *ECTRIMS*. 2015: P562.
5. Doyle C, Lennox L and Bell D. A systematic review of evidence on the links between patient experience and clinical safety and effectiveness. *BMJ open*. 2013; 3.
6. Atkinson MJ, Sinha A, Hass SL, et al. Validation of a general measure of treatment satisfaction, the Treatment Satisfaction Questionnaire for Medication (TSQM), using a national panel study of chronic disease. *Health Qual Life Outcomes*. 2004; 2: 12.
7. Mäurer M, Van Wijmeersch B, de Seze J, Meca-Lallana J, Bozzi S and Vermersch P. Significant and Meaningful Improvement in Treatment Satisfaction With Teriflunomide vs Subcutaneous IFN $\beta$ -1a in Patients With Relapsing MS: Results From TENERE [PND73]. *ISPOR*. Amsterdam, The Netherlands 2014.
